# Supplementary material for: TopREML: a topological restricted maximum likelihood approach to regionalize trended runoff signatures in stream networks
Source: Copernicus journal article supplement (doi:10.5194/hess-19-2925-2015), 2015-06-24
Supplement: Supplementary file 1 [file hess-19-2925-2015-supplement-cover-letter.pdf › hess-19-2925-2015-supplement-cover-letter.pdf]

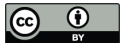

## *Supplement of*

# **TopREML: a topological restricted maximum likelihood approach to regionalize trended runoff signatures in stream networks**

**M. F. Müller and S. E. Thompson**

*Correspondence to:* M. F. Müller ([marc.f.muller@gmail.com](mailto:marc.f.muller@gmail.com))

- [hess-19-2925-2015-supplement-cover-letter.pdf](#)
- [ReadMe.rtf](#)
- [TopREML.R](#)
- [\\_\\_MACOSX](#)
  - [.\\_ReadMe.rtf](#)
  - [.\\_TopREML.R](#)

The copyright of individual parts of the supplement might differ from the CC-BY 3.0 licence.
